# Supplementary figures and images for: Focused ultrasound-mediated drug delivery of bevacizumab in treating NF2-related schwannomatosis in an animal model
Source: Research Square preprint supplement (doi:10.21203/rs.3.rs-7273065/v1), 2025-09-22

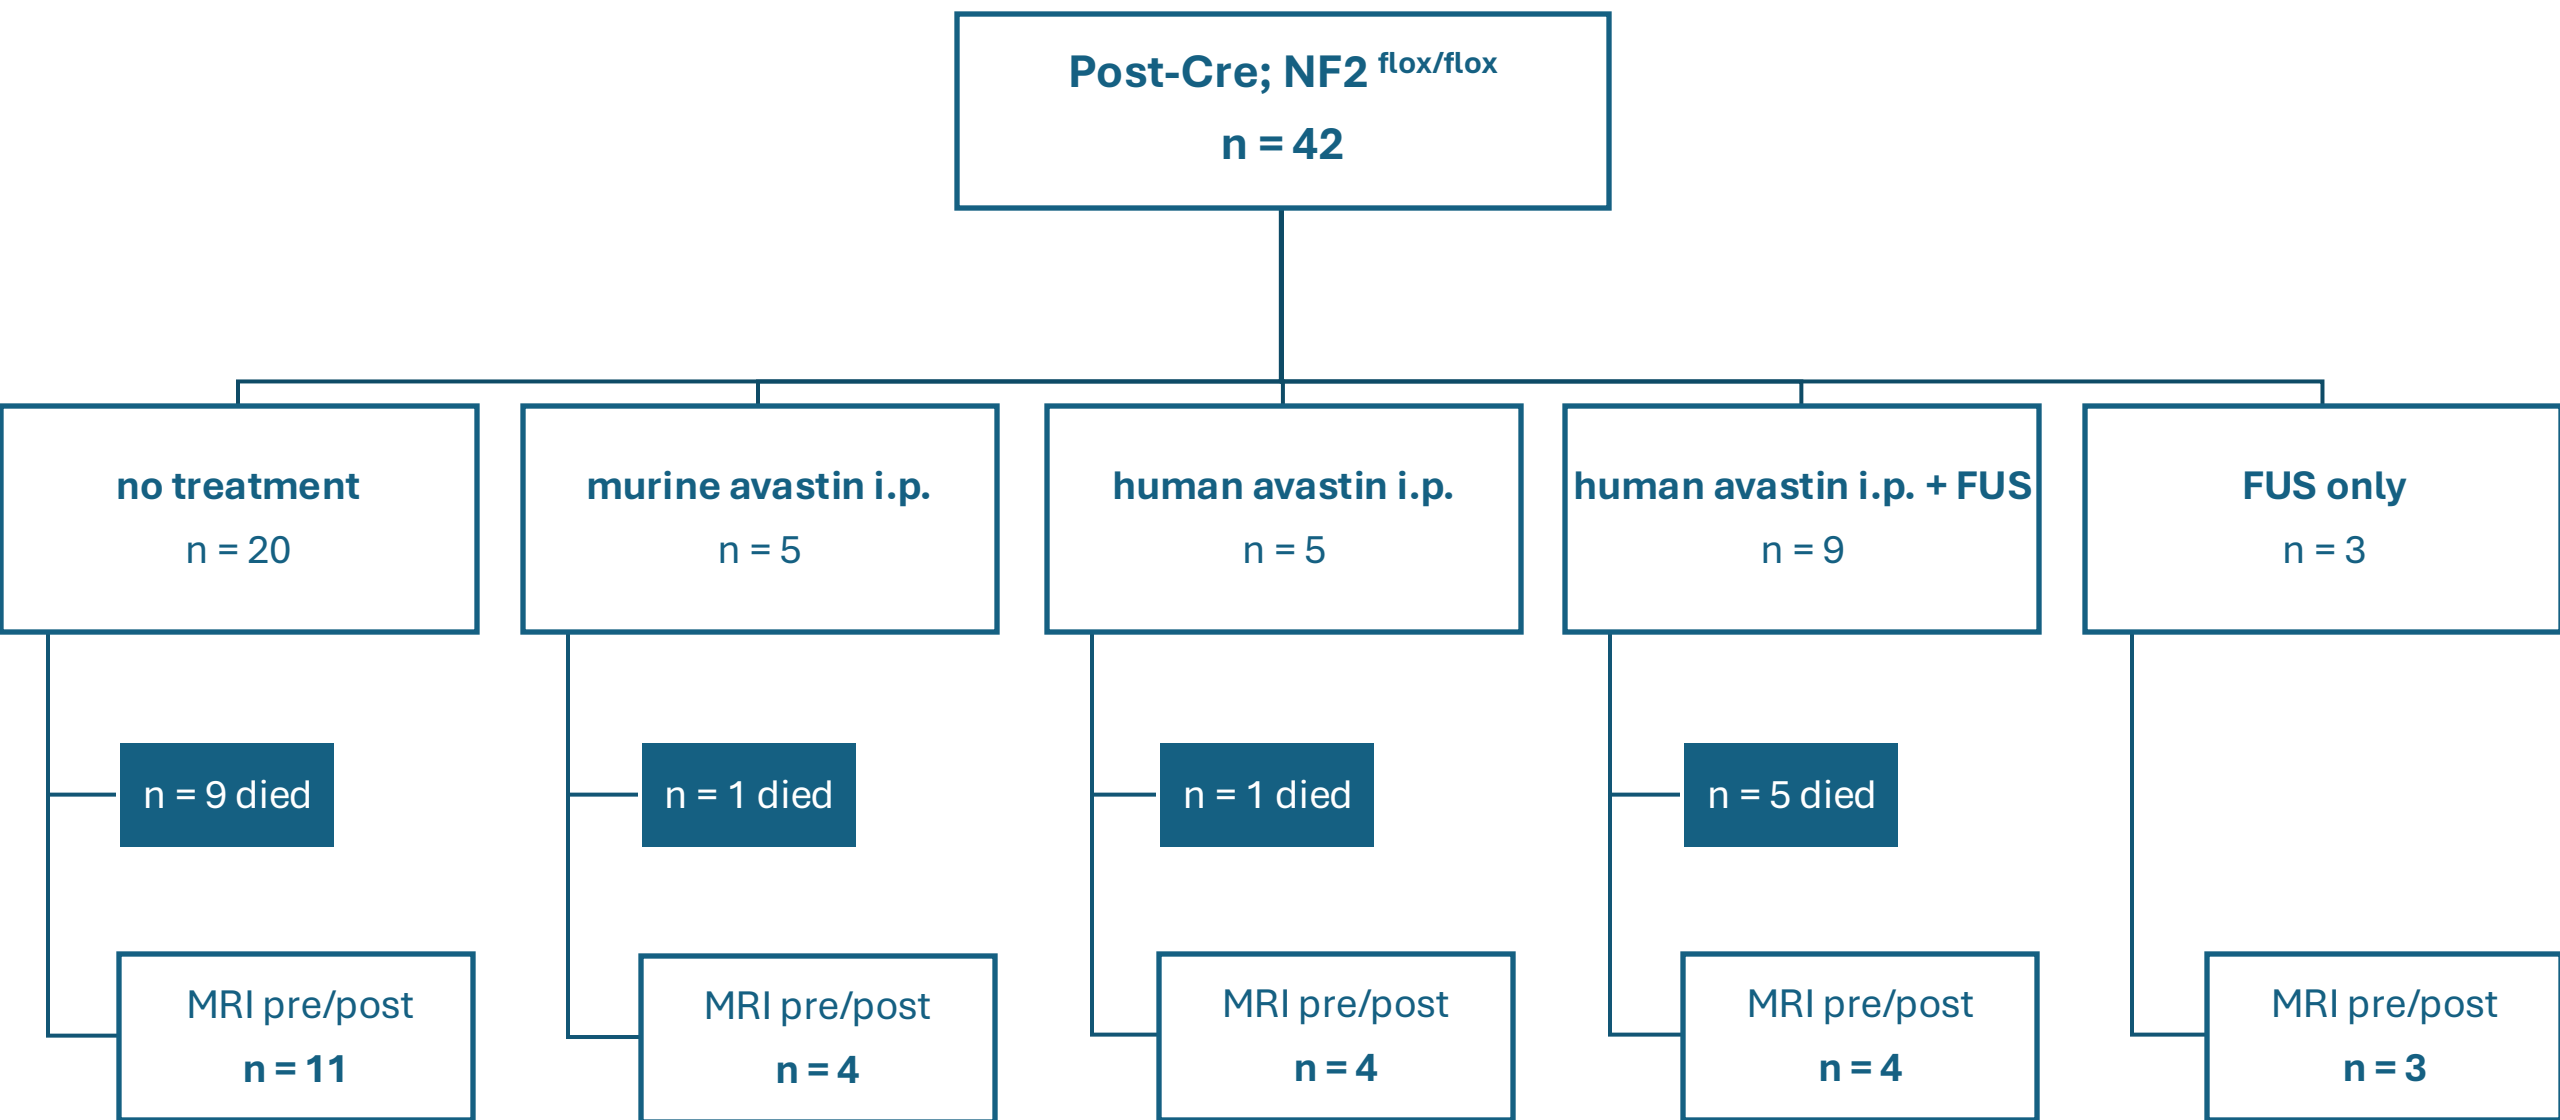

Supplement: Supplementary file 1 [file 181e2947b88e0ee474b99316.pdf]

## *I – Drug Delivery Study*

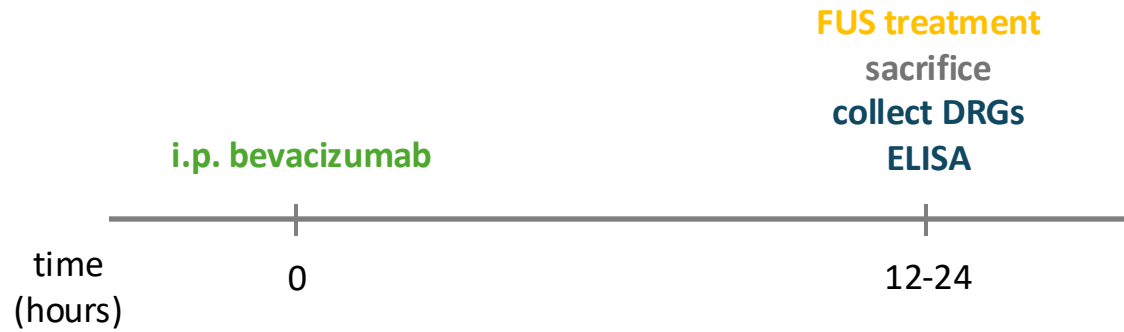

## *II – Chronic Treatment Study*

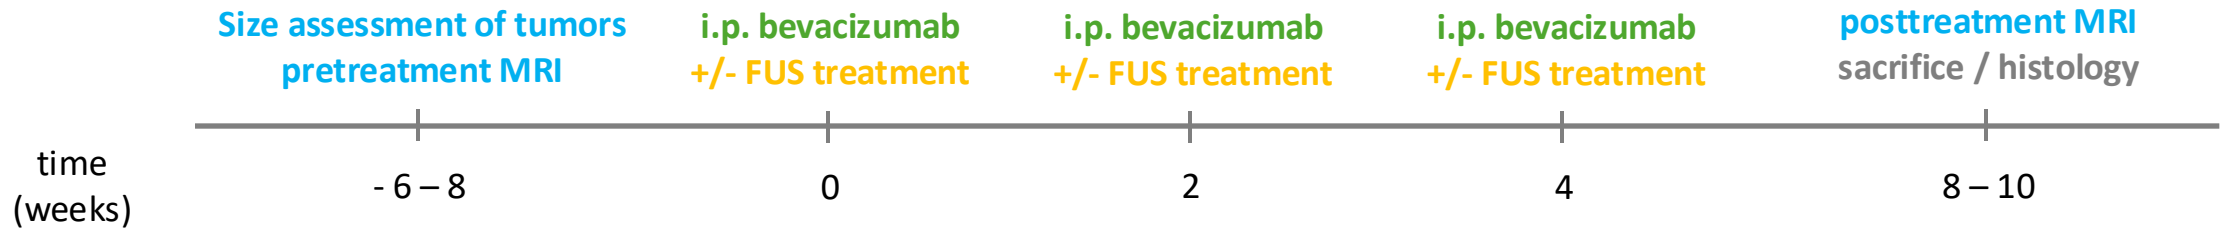

Supplement: Supplementary file 2 [file 39ecfcfb190099193e7a08cc.pdf]
